# Supplementary material for: Factors affecting motivation and retention of primary health care workers in three disparate regions in Kenya
Source: PubMed Central journal article supplement (PMC4097093; doi:10.1186/1478-4491-12-33), 2014-06-06
Supplement: 1478-4491-12-33-S1.pdf [file 1478-4491-12-33-S1.pdf]

ADDITIONAL FILES

Additional File 1: Percentage Distribution of Job Satisfaction Factors by Region

|                                                       |                   | County  |      |          |      |         |      |       |      | p-value |
|-------------------------------------------------------|-------------------|---------|------|----------|------|---------|------|-------|------|---------|
|                                                       |                   | Nairobi |      | Machakos |      | Turkana |      | Total |      |         |
|                                                       |                   | n       | %    | n        | %    | n       | %    | n     | %    |         |
| Considering everything, I am satisfied with my job.   | Strongly disagree | 10      | 6.0  | 13       | 9.6  | 2       | 2.0  | 25    | 6.2  | 0.163   |
|                                                       | Disagree          | 31      | 18.5 | 29       | 21.5 | 23      | 23.2 | 83    | 20.6 |         |
|                                                       | Neutral           | 49      | 29.2 | 44       | 32.6 | 23      | 23.2 | 116   | 28.9 |         |
|                                                       | Agree             | 44      | 26.2 | 31       | 23.0 | 31      | 31.3 | 106   | 26.4 |         |
|                                                       | Strongly Agree    | 34      | 20.2 | 18       | 13.3 | 20      | 20.2 | 72    | 17.9 |         |
| The job is a good match for my skills and experience. | Strongly disagree | 5       | 3.0  | 9        | 6.8  | 1       | 1.0  | 15    | 3.8  | 0.028   |
|                                                       | Disagree          | 20      | 11.9 | 25       | 18.8 | 7       | 7.1  | 52    | 13.0 |         |
|                                                       | Neutral           | 33      | 19.6 | 18       | 13.5 | 23      | 23.5 | 74    | 18.5 |         |
|                                                       | Agree             | 65      | 38.7 | 53       | 39.8 | 46      | 46.9 | 164   | 41.1 |         |
|                                                       | Strongly Agree    | 45      | 26.8 | 28       | 21.1 | 21      | 21.4 | 94    | 23.6 |         |
| When I come to work, I know what is expected of me.   | Strongly disagree | 1       | 0.6  | 0        | 0    | 0       | 0    | 1     | 0.2  | 0.002   |
|                                                       | Disagree          | 1       | 0.6  | 4        | 3.0  | 3       | 3.0  | 8     | 2.0  |         |
|                                                       | Neutral           | 22      | 13.0 | 22       | 16.4 | 17      | 17.2 | 61    | 15.2 |         |
|                                                       | Agree             | 39      | 23.1 | 54       | 40.3 | 43      | 43.4 | 136   | 33.8 |         |
|                                                       | Strongly Agree    | 105     | 62.1 | 54       | 40.3 | 36      | 36.4 | 195   | 48.5 |         |
| I receive recognition for doing good work.            | Strongly disagree | 17      | 10.1 | 11       | 8.1  | 4       | 4.0  | 32    | 8.0  | 0.001   |
|                                                       | Disagree          | 17      | 10.1 | 30       | 22.2 | 6       | 6.1  | 53    | 13.2 |         |
|                                                       | Neutral           | 40      | 23.8 | 40       | 29.6 | 30      | 30.3 | 110   | 27.4 |         |
|                                                       | Agree             | 51      | 30.4 | 33       | 24.4 | 39      | 39.4 | 123   | 30.6 |         |
|                                                       | Strongly Agree    | 43      | 25.6 | 21       | 15.6 | 20      | 20.2 | 84    | 20.9 |         |
| My immediate supervisor cares about me as a person    | Strongly disagree | 4       | 2.6  | 3        | 2.7  | 2       | 2.5  | 9     | 2.6  | 0.183   |
|                                                       | Disagree          | 10      | 6.6  | 4        | 3.5  | 1       | 1.3  | 15    | 4.3  |         |
|                                                       | Neutral           | 26      | 17.1 | 20       | 17.7 | 18      | 22.5 | 64    | 18.6 |         |
|                                                       | Agree             | 49      | 32.2 | 52       | 46.0 | 35      | 43.8 | 136   | 39.4 |         |
|                                                       | Strongly Agree    | 63      | 41.4 | 34       | 30.1 | 24      | 30.0 | 121   | 35.1 |         |

|                                                                |                   | County  |      |          |      |         |      |       |      | p-value |
|----------------------------------------------------------------|-------------------|---------|------|----------|------|---------|------|-------|------|---------|
|                                                                |                   | Nairobi |      | Machakos |      | Turkana |      | Total |      |         |
|                                                                |                   | n       | %    | n        | %    | n       | %    | n     | %    |         |
| My supervisor provides me with support and encouragement.      | Strongly disagree | 5       | 3.0  | 5        | 3.7  | 3       | 3.0  | 13    | 3.2  | 0.430   |
|                                                                | Disagree          | 14      | 8.3  | 12       | 8.9  | 6       | 6.1  | 32    | 7.9  |         |
|                                                                | Neutral           | 34      | 20.1 | 32       | 23.7 | 28      | 28.3 | 94    | 23.3 |         |
|                                                                | Agree             | 57      | 33.7 | 54       | 40.0 | 39      | 39.4 | 150   | 37.2 |         |
|                                                                | Strongly Agree    | 59      | 34.9 | 32       | 23.7 | 23      | 23.2 | 114   | 28.3 |         |
| Someone talks to me regularly to encourage my development      | Strongly disagree | 7       | 4.1  | 10       | 7.4  | 3       | 3.1  | 20    | 5.0  | 0.009   |
|                                                                | Disagree          | 33      | 19.5 | 23       | 17.0 | 3       | 3.1  | 59    | 14.7 |         |
|                                                                | Neutral           | 49      | 29.0 | 34       | 25.2 | 38      | 38.8 | 121   | 30.1 |         |
|                                                                | Agree             | 49      | 29.0 | 46       | 34.1 | 38      | 38.8 | 133   | 33.1 |         |
|                                                                | Strongly Agree    | 31      | 18.3 | 22       | 16.3 | 16      | 16.3 | 69    | 17.2 |         |
| Overall, the morale level at my department or section is good. | Strongly disagree | 7       | 4.2  | 8        | 5.9  | 4       | 4.0  | 19    | 4.7  | 0.600   |
|                                                                | Disagree          | 19      | 11.3 | 25       | 18.5 | 19      | 19.2 | 63    | 15.7 |         |
|                                                                | Neutral           | 48      | 28.6 | 36       | 26.7 | 28      | 28.3 | 112   | 27.9 |         |
|                                                                | Agree             | 65      | 38.7 | 49       | 36.3 | 31      | 31.3 | 145   | 36.1 |         |
|                                                                | Strongly Agree    | 29      | 17.3 | 17       | 12.6 | 17      | 17.2 | 63    | 15.7 |         |
| My opinion seems to matter at work; I am respected.            | Strongly disagree | 2       | 1.2  | 4        | 3.0  | 4       | 4.1  | 10    | 2.5  | 0.213   |
|                                                                | Disagree          | 16      | 9.7  | 19       | 14.1 | 3       | 3.1  | 38    | 9.5  |         |
|                                                                | Neutral           | 46      | 27.9 | 33       | 24.4 | 28      | 28.6 | 107   | 26.9 |         |
|                                                                | Agree             | 72      | 43.6 | 52       | 38.5 | 44      | 44.9 | 168   | 42.2 |         |
|                                                                | Strongly Agree    | 29      | 17.6 | 27       | 20.0 | 19      | 19.4 | 75    | 18.8 |         |
| I have at least one good friend at work.                       | Strongly disagree | 1       | 0.6  | 4        | 3.0  | 1       | 1.0  | 6     | 1.5  | 0.030   |
|                                                                | Disagree          | 10      | 6.0  | 7        | 5.2  | 1       | 1.0  | 18    | 4.5  |         |
|                                                                | Neutral           | 21      | 12.7 | 27       | 20.0 | 20      | 20.2 | 68    | 17.0 |         |
|                                                                | Agree             | 65      | 39.2 | 52       | 38.5 | 51      | 51.5 | 168   | 42.0 |         |
|                                                                | Strongly Agree    | 69      | 41.6 | 45       | 33.3 | 26      | 26.3 | 140   | 35.0 |         |

|                                                                                      |                   | County  |      |          |      |         |      |       |      | p-value |
|--------------------------------------------------------------------------------------|-------------------|---------|------|----------|------|---------|------|-------|------|---------|
|                                                                                      |                   | Nairobi |      | Machakos |      | Turkana |      | Total |      |         |
|                                                                                      |                   | n       | %    | n        | %    | n       | %    | n     | %    |         |
| I would encourage my friends and family to seek care here.                           | Strongly disagree | 3       | 2.0  | 7        | 6.2  | 2       | 2.5  | 12    | 3.5  | 0.023   |
|                                                                                      | Disagree          | 6       | 3.9  | 8        | 7.1  | 4       | 4.9  | 18    | 5.2  |         |
|                                                                                      | Neutral           | 26      | 17.1 | 13       | 11.5 | 6       | 7.4  | 45    | 13.0 |         |
|                                                                                      | Agree             | 45      | 29.6 | 41       | 36.3 | 41      | 50.6 | 127   | 36.7 |         |
|                                                                                      | Strongly Agree    | 72      | 47.4 | 44       | 38.9 | 28      | 34.6 | 144   | 41.6 |         |
| I have flexibility to balance the demands of my workplace and my personal life.      | Strongly disagree | 2       | 1.2  | 9        | 6.7  | 3       | 3.0  | 14    | 3.5  | 0.137   |
|                                                                                      | Disagree          | 29      | 17.4 | 22       | 16.3 | 11      | 11.1 | 62    | 15.5 |         |
|                                                                                      | Neutral           | 41      | 24.6 | 37       | 27.4 | 27      | 27.3 | 105   | 26.2 |         |
|                                                                                      | Agree             | 66      | 39.5 | 48       | 35.6 | 34      | 34.3 | 148   | 36.9 |         |
|                                                                                      | Strongly Agree    | 29      | 17.4 | 19       | 14.1 | 24      | 24.2 | 72    | 18.0 |         |
| I find my work at this facility to be enjoyable.                                     | Strongly disagree | 7       | 4.2  | 6        | 4.5  | 4       | 4.0  | 17    | 4.2  | 0.628   |
|                                                                                      | Disagree          | 18      | 10.7 | 17       | 12.7 | 12      | 12.1 | 47    | 11.7 |         |
|                                                                                      | Neutral           | 40      | 23.8 | 43       | 32.1 | 34      | 34.3 | 117   | 29.2 |         |
|                                                                                      | Agree             | 67      | 39.9 | 40       | 29.9 | 30      | 30.3 | 137   | 34.2 |         |
|                                                                                      | Strongly Agree    | 36      | 21.4 | 28       | 20.9 | 19      | 19.2 | 83    | 20.7 |         |
| My supervisors are kind to me; they do not verbally, physically or emotionally abuse | Strongly disagree | 3       | 1.8  | 5        | 3.7  | 1       | 1.0  | 9     | 2.2  | 0.013   |
|                                                                                      | Disagree          | 7       | 4.2  | 9        | 6.7  | 3       | 3.0  | 19    | 4.7  |         |
|                                                                                      | Neutral           | 30      | 17.9 | 31       | 23.0 | 35      | 35.4 | 96    | 23.9 |         |
|                                                                                      | Agree             | 60      | 35.7 | 45       | 33.3 | 40      | 40.4 | 145   | 36.1 |         |
|                                                                                      | Strongly Agree    | 68      | 40.5 | 44       | 32.6 | 20      | 20.2 | 132   | 32.8 |         |
| My peers are kind to me; they do not verbally, physically or emotionally abuse me.   | Strongly disagree | 3       | 1.8  | 2        | 1.5  | 0       | 0    | 5     | 1.2  | 0.232   |
|                                                                                      | Disagree          | 11      | 6.5  | 10       | 7.4  | 3       | 3.0  | 24    | 6.0  |         |
|                                                                                      | Neutral           | 32      | 18.9 | 28       | 20.7 | 29      | 29.3 | 89    | 22.1 |         |
|                                                                                      | Agree             | 60      | 35.5 | 49       | 36.3 | 42      | 42.4 | 151   | 37.5 |         |
|                                                                                      | Strongly Agree    | 63      | 37.3 | 46       | 34.1 | 25      | 25.3 | 134   | 33.3 |         |
| My patients and their family                                                         | Strongly disagree | 6       | 3.6  | 2        | 1.5  | 2       | 2.0  | 10    | 2.5  | 0.584   |

|                                                                                 |                   | County  |      |          |      |         |      |       |      | p-value |
|---------------------------------------------------------------------------------|-------------------|---------|------|----------|------|---------|------|-------|------|---------|
|                                                                                 |                   | Nairobi |      | Machakos |      | Turkana |      | Total |      |         |
|                                                                                 |                   | n       | %    | n        | %    | n       | %    | n     | %    |         |
| members are kind to me; they do not verbally, physically or                     | Disagree          | 18      | 10.7 | 10       | 7.4  | 4       | 4.0  | 32    | 8.0  |         |
|                                                                                 | Neutral           | 34      | 20.2 | 30       | 22.2 | 27      | 27.3 | 91    | 22.6 |         |
|                                                                                 | Agree             | 62      | 36.9 | 54       | 40.0 | 38      | 38.4 | 154   | 38.3 |         |
|                                                                                 | Strongly Agree    | 48      | 28.6 | 39       | 28.9 | 28      | 28.3 | 115   | 28.6 |         |
| I have been provided the training needed to succeed in my position.(on the job  | Strongly disagree | 7       | 4.2  | 14       | 10.4 | 15      | 15.2 | 36    | 9.0  | <0.0001 |
|                                                                                 | Disagree          | 27      | 16.1 | 29       | 21.5 | 25      | 25.3 | 81    | 20.1 |         |
|                                                                                 | Neutral           | 32      | 19.0 | 33       | 24.4 | 32      | 32.3 | 97    | 24.1 |         |
|                                                                                 | Agree             | 52      | 31.0 | 37       | 27.4 | 10      | 10.1 | 99    | 24.6 |         |
|                                                                                 | Strongly Agree    | 49      | 29.2 | 22       | 16.3 | 17      | 17.2 | 88    | 21.9 |         |
| The organization takes specific measures to protect me against HIV/AIDS and TB. | Strongly disagree | 6       | 3.6  | 12       | 9.0  | 7       | 7.1  | 25    | 6.2  | 0.313   |
|                                                                                 | Disagree          | 15      | 8.9  | 14       | 10.4 | 8       | 8.1  | 37    | 9.2  |         |
|                                                                                 | Neutral           | 37      | 21.9 | 36       | 26.9 | 27      | 27.3 | 100   | 24.9 |         |
|                                                                                 | Agree             | 58      | 34.3 | 45       | 33.6 | 35      | 35.4 | 138   | 34.3 |         |
|                                                                                 | Strongly Agree    | 53      | 31.4 | 27       | 20.1 | 22      | 22.2 | 102   | 25.4 |         |
| I consider myself a part of this community.                                     | Strongly disagree | 0       | 0    | 1        | 0.7  | 0       | 0    | 1     | 0.2  | 0.805   |
|                                                                                 | Disagree          | 7       | 4.2  | 8        | 5.9  | 4       | 4.0  | 19    | 4.7  |         |
|                                                                                 | Neutral           | 35      | 20.8 | 30       | 22.2 | 20      | 20.2 | 85    | 21.1 |         |
|                                                                                 | Agree             | 68      | 40.5 | 46       | 34.1 | 34      | 34.3 | 148   | 36.8 |         |
|                                                                                 | Strongly Agree    | 57      | 33.9 | 50       | 37.0 | 41      | 41.4 | 148   | 36.8 |         |
| I am fairly evaluated on my work.                                               | Strongly disagree | 0       | 0    | 7        | 5.3  | 7       | 7.1  | 14    | 3.5  | 0.002   |
|                                                                                 | Disagree          | 10      | 6.0  | 16       | 12.1 | 2       | 2.0  | 28    | 7.1  |         |
|                                                                                 | Neutral           | 39      | 23.5 | 33       | 25.0 | 27      | 27.3 | 99    | 24.9 |         |
|                                                                                 | Agree             | 70      | 42.2 | 51       | 38.6 | 45      | 45.5 | 166   | 41.8 |         |
|                                                                                 | Strongly Agree    | 47      | 28.3 | 25       | 18.9 | 18      | 18.2 | 90    | 22.7 |         |
| The in charge here is competent and                                             | Strongly disagree | 1       | 0.7  | 6        | 5.3  | 3       | 3.7  | 10    | 2.9  | 0.060   |

|                                                                              |                   | County  |      |          |      |         |      |       |      | p-value |
|------------------------------------------------------------------------------|-------------------|---------|------|----------|------|---------|------|-------|------|---------|
|                                                                              |                   | Nairobi |      | Machakos |      | Turkana |      | Total |      |         |
|                                                                              |                   | n       | %    | n        | %    | n       | %    | n     | %    |         |
| Neutral                                                                      |                   | 13      | 8.6  | 9        | 8.0  | 12      | 14.8 | 34    | 9.9  |         |
| Agree                                                                        |                   | 61      | 40.4 | 38       | 33.6 | 38      | 46.9 | 137   | 39.7 |         |
| Strongly Agree                                                               |                   | 69      | 45.7 | 53       | 46.9 | 27      | 33.3 | 149   | 43.2 |         |
| I am actively involved in helping to make this a great health care facility. | Strongly disagree | 1       | 0.7  | 2        | 1.8  | 1       | 1.2  | 4     | 1.2  | 0.426   |
|                                                                              | Disagree          | 3       | 2.0  | 6        | 5.3  | 0       | 0    | 9     | 2.6  |         |
|                                                                              | Neutral           | 13      | 8.5  | 7        | 6.2  | 7       | 8.6  | 27    | 7.8  |         |
|                                                                              | Agree             | 60      | 39.2 | 50       | 44.2 | 36      | 44.4 | 146   | 42.1 |         |
|                                                                              | Strongly Agree    | 76      | 49.7 | 48       | 42.5 | 37      | 45.7 | 161   | 46.4 |         |
