# Supplementary material for: Factors affecting motivation and retention of primary health care workers in three disparate regions in Kenya
Source: PubMed Central journal article supplement (PMC4097093; doi:10.1186/1478-4491-12-33), 2014-06-06
Supplement: 1478-4491-12-33-S2.pdf [file 1478-4491-12-33-S2.pdf]

**Additional File 2: Distribution of Factors Related to the Work Environment by Region**

|                                                                |                   | County  |      |          |      |         |      |       |      | p-value |
|----------------------------------------------------------------|-------------------|---------|------|----------|------|---------|------|-------|------|---------|
|                                                                |                   | Nairobi |      | Machakos |      | Turkana |      | Total |      |         |
|                                                                |                   | n       | %    | n        | %    | n       | %    | n     | %    |         |
| The workload is manageable.                                    | Strongly disagree | 4       | 2.4  | 16       | 12.0 | 5       | 5.1  | 25    | 6.2  | 0.001   |
|                                                                | Disagree          | 21      | 12.4 | 19       | 14.3 | 21      | 21.2 | 61    | 15.2 |         |
|                                                                | Neutral           | 25      | 14.7 | 22       | 16.5 | 4       | 4.0  | 51    | 12.7 |         |
|                                                                | Agree             | 92      | 54.1 | 57       | 42.9 | 47      | 47.5 | 196   | 48.8 |         |
|                                                                | Strongly Agree    | 28      | 16.5 | 19       | 14.3 | 22      | 22.2 | 69    | 17.2 |         |
| Adequate supplies (gloves, needles, bandages, etc).            | Strongly disagree | 6       | 3.5  | 17       | 12.6 | 12      | 12.1 | 35    | 8.6  | <0.0001 |
|                                                                | Disagree          | 18      | 10.5 | 33       | 24.4 | 16      | 16.2 | 67    | 16.5 |         |
|                                                                | Neutral           | 26      | 15.2 | 23       | 17.0 | 10      | 10.1 | 59    | 14.6 |         |
|                                                                | Agree             | 53      | 31.0 | 36       | 26.7 | 29      | 29.3 | 118   | 29.1 |         |
|                                                                | Strongly Agree    | 68      | 39.8 | 26       | 19.3 | 32      | 32.3 | 126   | 31.1 |         |
| Equipment available                                            | Strongly disagree | 18      | 11.3 | 28       | 21.1 | 32      | 32.7 | 78    | 19.9 | <0.0001 |
|                                                                | Disagree          | 19      | 11.9 | 42       | 31.6 | 30      | 30.6 | 91    | 23.3 |         |
|                                                                | Neutral           | 39      | 24.4 | 23       | 17.3 | 11      | 11.2 | 73    | 18.7 |         |
|                                                                | Agree             | 52      | 32.5 | 33       | 24.8 | 15      | 15.3 | 100   | 25.6 |         |
|                                                                | Strongly Agree    | 32      | 20.0 | 7        | 5.3  | 10      | 10.2 | 49    | 12.5 |         |
| Good access to drugs and medications.                          | Strongly disagree | 2       | 1.3  | 6        | 5.3  | 3       | 3.7  | 11    | 3.2  | <0.0001 |
|                                                                | Disagree          | 10      | 6.5  | 27       | 23.9 | 7       | 8.6  | 44    | 12.6 |         |
|                                                                | Neutral           | 20      | 12.9 | 25       | 22.1 | 7       | 8.6  | 52    | 14.9 |         |
|                                                                | Agree             | 53      | 34.2 | 34       | 30.1 | 40      | 49.4 | 127   | 36.4 |         |
|                                                                | Strongly Agree    | 70      | 45.2 | 21       | 18.6 | 24      | 29.6 | 115   | 33.0 |         |
| My job allows me to take time to relax during the lunch break. | Strongly disagree | 4       | 2.6  | 13       | 11.5 | 2       | 2.5  | 19    | 5.5  | 0.002   |
|                                                                | Disagree          | 21      | 13.6 | 24       | 21.2 | 10      | 12.3 | 55    | 15.8 |         |
|                                                                | Neutral           | 27      | 17.5 | 10       | 8.8  | 6       | 7.4  | 43    | 12.4 |         |
|                                                                | Agree             | 55      | 35.7 | 41       | 36.3 | 38      | 46.9 | 134   | 38.5 |         |
|                                                                | Strongly Agree    | 47      | 30.5 | 25       | 22.1 | 25      | 30.9 | 97    | 27.9 |         |

|                                                      |                   | County  |      |          |      |         |      |       |      | p-value |
|------------------------------------------------------|-------------------|---------|------|----------|------|---------|------|-------|------|---------|
|                                                      |                   | Nairobi |      | Machakos |      | Turkana |      | Total |      |         |
|                                                      |                   | n       | %    | n        | %    | n       | %    | n     | %    |         |
| I am allowed to go on leave                          | Strongly disagree | 5       | 3.2  | 16       | 14.2 | 6       | 7.5  | 27    | 7.8  | <0.0001 |
|                                                      | Disagree          | 8       | 5.2  | 14       | 12.4 | 14      | 17.5 | 36    | 10.3 |         |
|                                                      | Neutral           | 12      | 7.7  | 12       | 10.6 | 4       | 5.0  | 28    | 8.0  |         |
|                                                      | Agree             | 40      | 25.8 | 31       | 27.4 | 29      | 36.3 | 100   | 28.7 |         |
|                                                      | Strongly Agree    | 90      | 58.1 | 40       | 35.4 | 27      | 33.8 | 157   | 45.1 |         |
| At my residence, I have access to safe, clean water. | Strongly disagree | 4       | 2.3  | 16       | 11.9 | 12      | 12.2 | 32    | 7.9  | <0.0001 |
|                                                      | Disagree          | 17      | 9.9  | 28       | 20.7 | 13      | 13.3 | 58    | 14.4 |         |
|                                                      | Neutral           | 16      | 9.4  | 10       | 7.4  | 11      | 11.2 | 37    | 9.2  |         |
|                                                      | Agree             | 56      | 32.7 | 45       | 33.3 | 36      | 36.7 | 137   | 33.9 |         |
|                                                      | Strongly Agree    | 78      | 45.6 | 35       | 25.9 | 26      | 26.5 | 139   | 34.4 |         |
|                                                      | 34                | 0       | 0    | 1        | 0.7  | 0       | 0    | 1     | 0.2  |         |
| At work, I have access to safe, clean water.         | Strongly disagree | 7       | 4.1  | 14       | 10.4 | 10      | 10.1 | 31    | 7.7  | <0.0001 |
|                                                      | Disagree          | 8       | 4.7  | 36       | 26.7 | 12      | 12.1 | 56    | 13.8 |         |
|                                                      | Neutral           | 15      | 8.8  | 11       | 8.1  | 10      | 10.1 | 36    | 8.9  |         |
|                                                      | Agree             | 57      | 33.3 | 43       | 31.9 | 37      | 37.4 | 137   | 33.8 |         |
|                                                      | Strongly Agree    | 84      | 49.1 | 31       | 23.0 | 30      | 30.3 | 145   | 35.8 |         |
| At residence, I have good access to electricity      | Strongly disagree | 3       | 1.9  | 19       | 16.8 | 39      | 48.1 | 61    | 17.5 | <0.0001 |
|                                                      | Disagree          | 8       | 5.2  | 16       | 14.2 | 30      | 37.0 | 54    | 15.5 |         |
|                                                      | Neutral           | 10      | 6.5  | 5        | 4.4  | 2       | 2.5  | 17    | 4.9  |         |
|                                                      | Agree             | 54      | 34.8 | 33       | 29.2 | 9       | 11.1 | 96    | 27.5 |         |
|                                                      | Strongly Agree    | 80      | 51.6 | 40       | 35.4 | 1       | 1.2  | 121   | 34.7 |         |
| At work, I have good access to electricity.          | Strongly disagree | 4       | 2.4  | 10       | 7.4  | 32      | 32.3 | 46    | 11.4 | <0.0001 |
|                                                      | Disagree          | 6       | 3.6  | 7        | 5.2  | 22      | 22.2 | 35    | 8.7  |         |
|                                                      | Neutral           | 18      | 10.7 | 9        | 6.7  | 7       | 7.1  | 34    | 8.5  |         |
|                                                      | Agree             | 55      | 32.7 | 40       | 29.6 | 23      | 23.2 | 118   | 29.4 |         |
|                                                      | Strongly Agree    | 85      | 50.6 | 69       | 51.1 | 15      | 15.2 | 169   | 42.0 |         |
| I have access to good schooling for my children.     | Strongly disagree | 11      | 7.3  | 23       | 18.3 | 18      | 18.6 | 52    | 13.9 | <0.0001 |
|                                                      | Disagree          | 11      | 7.3  | 26       | 20.6 | 11      | 11.3 | 48    | 12.8 |         |
|                                                      | Neutral           | 34      | 22.5 | 29       | 23.0 | 14      | 14.4 | 77    | 20.6 |         |
|                                                      | Agree             | 57      | 37.7 | 34       | 27.0 | 33      | 34.0 | 124   | 33.2 |         |
|                                                      | Strongly Agree    | 38      | 25.2 | 14       | 11.1 | 21      | 21.6 | 73    | 19.5 |         |

|                                                                                  |                   | County  |      |          |      |         |      |       |      | p-value |
|----------------------------------------------------------------------------------|-------------------|---------|------|----------|------|---------|------|-------|------|---------|
|                                                                                  |                   | Nairobi |      | Machakos |      | Turkana |      | Total |      |         |
|                                                                                  |                   | n       | %    | n        | %    | n       | %    | n     | %    |         |
| I have safe and efficient transportation to work                                 | Strongly disagree | 18      | 11.0 | 22       | 16.3 | 23      | 23.7 | 63    | 15.9 | <0.0001 |
|                                                                                  | Disagree          | 21      | 12.9 | 38       | 28.1 | 35      | 36.1 | 94    | 23.8 |         |
|                                                                                  | Neutral           | 42      | 25.8 | 21       | 15.6 | 12      | 12.4 | 75    | 19.0 |         |
|                                                                                  | Agree             | 54      | 33.1 | 35       | 25.9 | 14      | 14.4 | 103   | 26.1 |         |
|                                                                                  | Strongly Agree    | 28      | 17.2 | 19       | 14.1 | 13      | 13.4 | 60    | 15.2 |         |
| I feel I have job security                                                       | Strongly disagree | 23      | 13.8 | 27       | 20.0 | 18      | 18.2 | 68    | 17.0 | 0.042   |
|                                                                                  | Disagree          | 23      | 13.8 | 34       | 25.2 | 20      | 20.2 | 77    | 19.2 |         |
|                                                                                  | Neutral           | 35      | 21.0 | 25       | 18.5 | 16      | 16.2 | 76    | 19.0 |         |
|                                                                                  | Agree             | 61      | 36.5 | 26       | 19.3 | 27      | 27.3 | 114   | 28.4 |         |
|                                                                                  | Strongly Agree    | 25      | 15.0 | 23       | 17.0 | 18      | 18.2 | 66    | 16.5 |         |
| I feel there is adequate security at my residence and within the surrounding     | Strongly disagree | 14      | 9.2  | 14       | 12.4 | 12      | 14.8 | 40    | 11.5 | 0.004   |
|                                                                                  | Disagree          | 24      | 15.7 | 31       | 27.4 | 14      | 17.3 | 69    | 19.9 |         |
|                                                                                  | Neutral           | 45      | 29.4 | 12       | 10.6 | 12      | 14.8 | 69    | 19.9 |         |
|                                                                                  | Agree             | 46      | 30.1 | 40       | 35.4 | 24      | 29.6 | 110   | 31.7 |         |
|                                                                                  | Strongly Agree    | 24      | 15.7 | 16       | 14.2 | 19      | 23.5 | 59    | 17.0 |         |
| The community where I live has good shopping areas and entertainment.            | Strongly disagree | 10      | 6.6  | 17       | 15.0 | 12      | 15.0 | 39    | 11.3 | 0.008   |
|                                                                                  | Disagree          | 23      | 15.2 | 24       | 21.2 | 19      | 23.8 | 66    | 19.2 |         |
|                                                                                  | Neutral           | 46      | 30.5 | 13       | 11.5 | 15      | 18.8 | 74    | 21.5 |         |
|                                                                                  | Agree             | 47      | 31.1 | 43       | 38.1 | 24      | 30.0 | 114   | 33.1 |         |
|                                                                                  | Strongly Agree    | 25      | 16.6 | 16       | 14.2 | 10      | 12.5 | 51    | 14.8 |         |
| I understand and appreciate the cultural values within the surrounding community | Strongly disagree | 5       | 3.0  | 6        | 4.5  | 1       | 1.0  | 12    | 3.0  | <0.0001 |
|                                                                                  | Disagree          | 14      | 8.3  | 15       | 11.2 | 1       | 1.0  | 30    | 7.5  |         |
|                                                                                  | Neutral           | 42      | 25.0 | 21       | 15.7 | 11      | 11.2 | 74    | 18.5 |         |
|                                                                                  | Agree             | 69      | 41.1 | 64       | 47.8 | 41      | 41.8 | 174   | 43.5 |         |
|                                                                                  | Strongly Agree    | 38      | 22.6 | 28       | 20.9 | 44      | 44.9 | 110   | 27.5 |         |
