# Supplementary material for: Factors affecting motivation and retention of primary health care workers in three disparate regions in Kenya
Source: PubMed Central journal article supplement (PMC4097093; doi:10.1186/1478-4491-12-33), 2014-06-06
Supplement: 1478-4491-12-33-S3.pdf [file 1478-4491-12-33-S3.pdf]

**Additional File 3: Comparison of Compensation Factors by Type of Facility**

|                                                                            |                   | Government |      | Private/NGO |      | p-value |
|----------------------------------------------------------------------------|-------------------|------------|------|-------------|------|---------|
|                                                                            |                   | n          | %    | n           | %    |         |
| My salary package is fair                                                  | Strongly disagree | 67         | 35.4 | 49          | 23.1 | <0.0001 |
|                                                                            | Disagree          | 68         | 36.0 | 48          | 22.6 |         |
|                                                                            | Neutral           | 34         | 18.0 | 47          | 22.2 |         |
|                                                                            | Agree             | 14         | 7.4  | 54          | 25.5 |         |
|                                                                            | Strongly Agree    | 6          | 3.2  | 14          | 6.6  |         |
| I feel there are sufficient opportunities for promotion with this employer | Strongly disagree | 34         | 18.0 | 32          | 15.1 | 0.019   |
|                                                                            | Disagree          | 51         | 27.0 | 39          | 18.4 |         |
|                                                                            | Neutral           | 36         | 19.0 | 68          | 32.1 |         |
|                                                                            | Agree             | 51         | 27.0 | 48          | 22.6 |         |
|                                                                            | Strongly Agree    | 17         | 9.0  | 25          | 11.8 |         |
| I feel there is no stagnation in the Ministry/organization                 | Strongly disagree | 32         | 19.6 | 23          | 12.7 | 0.022   |
|                                                                            | Disagree          | 36         | 22.1 | 22          | 12.2 |         |
|                                                                            | Neutral           | 39         | 23.9 | 56          | 30.9 |         |
|                                                                            | Agree             | 37         | 22.7 | 56          | 30.9 |         |
|                                                                            | Strongly Agree    | 19         | 11.7 | 24          | 13.3 |         |
